# Supplementary material
Source: PubMed Central journal article supplement (PMC2584696)
Supplement: 0809543105_0809543105SI.pdf [file 0809543105_0809543105SI.pdf]

For this selection, the amounts of loaded and eluted phage throughout the rounds are listed in Table S7. Note that the stringency of round 1 was low and, thus, the amount of eluted phage was high. This ensures that no arbitrary loss of functional clones occurs when very few copies of each clone are present in the library.

**Expression of Free scFv Proteins.** To express scFvs as free proteins without fusion to phage, the coding regions for scFvs 66CC8, 412d-2SY, and 412d-Y were inserted into the pBAD expression vector containing a gIII periplasmic signal sequence, and a C-terminal 6X-histidine tag using standard methods. This yielded pBAD-66CC8, pBAD-412d-2SY, and pBAD-412d-Y.

To express 412d-Y as an scFv, Top10 F' cells containing pBAD-412d-Y were grown at 37°C at 250 rpm in 2YT supplemented with 100- $\mu$ g/ml ampicillin until the optical density reached 0.6, at which point scFv production was induced with 0.1% L-arabinose. The culture was then allowed to shake at 250 rpm at room temperature for 30 h, after which cells were pelleted and lysed in 8M urea because no soluble scFv was produced. Refolding using the Protein Refolding Kit (Novagen) yielded soluble scFv.

To express 412d-2SY as an scFv, Top10 F' cells containing pBAD-412d-SY along with pSUPAR6-L3-3SY, an optimized plasmid adapted for expression with unnatural amino acids that, in this case, contains the sulfotyrosine-specific synthetase and the corresponding orthogonal tRNA [Cellitti S, *et al.* (2008) *J Am Chem Soc* 130:9268–9281], were grown at 37°C at 250 rpm in 2YT supplemented with 100- $\mu$ g/ml ampicillin, 30- $\mu$ g/ml chloramphenicol, and 10-mM sulfotyrosine (Bachem). When the optical density reached 0.6, both synthetase and scFv production were induced with 0.2% L-arabinose. The culture was then allowed to shake at 250 rpm at room temperature for 30 h, after which cells were pelleted and lysed in 8M urea. Refolding using the Protein Refolding Kit (Novagen) yielded soluble scFv.

To express 66CC8-SY as an scFv, Top10 F' cells containing pBAD-66CC8 along with pSUPAR6-L3-3SY were grown at 37°C at 250 rpm in 2YT supplemented with 100- $\mu$ g/ml ampicillin, 30- $\mu$ g/ml chloramphenicol, and 10-mM sulfotyrosine (Bachem). When the optical density reached 0.6, both synthetase and scFv production were induced with 0.2% L-arabinose. The culture was then allowed to shake at 250 rpm at room temperature for 30 h, after which cells were pelleted and lysed in 8M urea. Refolding was unsuccessful as no soluble protein was recovered.

To express 66CC8-Y as an scFv, Top10 F' cells containing pBAD-66CC8 along with pCDF-JYRS, a plasmid that encodes tyrosine in response to TAG, were grown at 37°C at 250 rpm in 2YT supplemented with 100- $\mu$ g/ml ampicillin and 30- $\mu$ g/ml chloramphenicol. When the optical density reached 0.6, both synthetase and scFv production were induced with 0.2% L-arabinose. The culture was then allowed to shake at 250 rpm at room temperature for 30 h, after which cells were pelleted and lysed in 8M urea. Refolding was unsuccessful as no soluble protein was recovered.

Protein yield was determined by Western blot analysis using an anti-6XHis antibody (Sigma) and a standard 6X-histidine tagged protein of known concentration.

**Expression and Purification of Free Fab Proteins.** To convert phage-displayed scFvs into Fab format, the light chain and heavy chain variable regions for scFvs 66CC14, 66CC8, 412d-2SY, and 412d-Y were separately inserted into the pBC expression vector containing human heavy and light-chain constant regions (synthesized by Blue Heron) using standard methods. This yielded pBC-66CC14Fab, pBC-66CC8Fab, pBC-412d-2SYFab, and pBC-412d-YFab for Fab expression from a bicistronic construct under the lac promoter.

To express 66CC14 and 412d-Y as Fabs, Top10 F' cells

containing either pBC-66CC14Fab or pBC-412d-YFab were grown at 37°C at 250 rpm in 2YT supplemented with 100- $\mu$ g/ml ampicillin until the optical density reached 0.6, at which point Fab production was induced with 1 mM IPTG. The culture was then allowed to shake at 250 rpm at room temperature for 30 h, after which cells were pelleted and lysed three times with 1/20 culture volume of periplasmic lysis buffer (20% sucrose, 30-mM Tris-HCl, 1-mM EDTA, 1-mg/ml lysozyme, pH 7.4). The periplasmic lysate was collected for purification on protein G resin.

To express 412d-2SY and 66CC8-SY as Fabs, Top10 F' cells containing pBC-412d-SYFab or pBC-66CC8-SYFab along with pSUPAR6-L3-3SY were grown at 37°C at 250 rpm in 2YT supplemented with 100- $\mu$ g/ml ampicillin, 30- $\mu$ g/ml chloramphenicol, and 10-mM sulfotyrosine (Bachem). When the optical density reached 0.3, synthetase production was induced with 0.2% L-arabinose. When the optical density reached 0.6, Fab production was induced with 1-mM IPTG. The culture was then allowed to shake at 250 rpm at room temperature for 30 h, after which cells were pelleted and lysed three times with 1/20 culture volume of periplasmic lysis buffer. The periplasmic lysate was collected for purification on protein G resin.

To express 66CC8-Y as a Fab, Top10 F' cells containing pBC-66CC8Fab along with pCDF-JYRS were grown at 37°C at 250 rpm in 2YT supplemented with 100- $\mu$ g/ml ampicillin and 30- $\mu$ g/ml chloramphenicol. When the optical density reached 0.3, synthetase production was induced with 0.2% L-arabinose. When the optical density reached 0.6, Fab production was induced with 1 mM isopropyl-beta-D-thiogalactopyranoside (IPTG). The culture was then allowed to shake at 250 rpm at room temperature for 30 h, after which cells were pelleted and lysed three times with 1/20 culture volume of periplasmic lysis buffer. The periplasmic lysate was collected for purification on protein G resin.

To purify periplasmic lysates using protein G, 1 ml of protein G resin (Pierce) was packed into a 1-ml polypropylene column (Qiagen). After equilibration of the column with 5-ml binding buffer (50-mM Mes, 100-mM NaCl, pH 5.5), periplasmic lysate was loaded onto the column and allowed to pass through the resin by gravity flow. The column was then washed with 15-ml binding buffer and then eluted with 5-ml elution buffer (100-mM glycine, pH 2.8), which was immediately neutralized to pH 7.4. The eluted Fab was then dialyzed into PBS and concentrated for further use. Fab yield was determined by UV absorbance at  $\lambda = 280$ .

**Determination of gp120-Binding by Fabs Using ELISA.** Per sample, 0.33  $\mu$ g of soluble ADA gp120 was coated onto the surface of a MaxiSorp (Nunc) microtiter plate well in 100- $\mu$ l PBS for 12 h at 37°C. After blocking for 2 h with 200  $\mu$ l 2% milk (Bio-Rad) in PBS, Fab proteins, previously purified and quantified according to the procedures described above, were loaded in 100  $\mu$ l 2% milk PBST and incubated at 37°C for 2 h. After washing five times with PBST, an antihuman kappa light-chain antibody (Sigma) was added in 110  $\mu$ l of 2% milk in PBST and incubated at 37°C for 2 h. After washing eight times with PBST, QuantaBlu fluorogenic substrate (Pierce) was added and the ELISA signal was determined using a fluorescence plate reader (SpectraMax Gemini).

#### Synthesis of Bipyridyl-Alanine

**5-Methyl-2,2'-Bipyridine.** A mixture of 2-bromo-5-methylpyridine (5.0 g, 29 mmol), 2-tributylstannylpyridine (10 g, 27 mmol), and Pd(PPh<sub>3</sub>)<sub>4</sub> (2.0 g, 1.7 mmol) in dry toluene (250 ml) was stirred for 48 h at 110°C. The reaction mixture was filtered over Celite and evaporated under reduced pressure. The residue was dissolved in EtOAc and washed with saturated aqueous NaHCO<sub>3</sub>

solution, and the organic layer was dried over  $\text{MgSO}_4$  and concentrated under reduced pressure. Flash column chromatography (0.5% MeOH in  $\text{CH}_2\text{Cl}_2$ ) afforded methyl-2,2'-bipyridine (3.5 g, 75%) as a colorless oil.  $^1\text{H-NMR}$  (500 MHz,  $\text{CDCl}_3$ ):  $\delta$  2.47 (s, 3H), 7.35 (dd, 1H), 7.70 (dd, 1H), 7.87 (m, 1H), 8.36 (d, 1H), 8.43 (d, 1H), 8.58 (d, 1H), 8.74 (dd, 1H).

**Diethyl 2-(2,2'-bipyridin-5-ylmethyl)-2-Acetamidomalonate.** Methyl-2,2'-bipyridine (1.7 g, 10 mmol) in a mixed solvent (100 ml) of water and benzene (1:1) was irradiated and refluxed using a halogen lamp (150 W). Bromine (1.6 g, 10 mmol) was added and the mixture was heated to reflux for 30 min. The solution was concentrated under reduced pressure and dissolved in EtOAc. The organic layer was washed with saturated aqueous  $\text{NaHCO}_3$  solution, dried over  $\text{MgSO}_4$ , and concentrated under reduced pressure to afford the crude brominated product. A mixture of diethyl acetamidomalonate (2.6 g, 12 mmol) and sodium hydride (0.48 g, 12 mmol, 60% in mineral oil) in dry DMF (50 ml) was stirred for 30 min at  $0^\circ\text{C}$ . To the solution was added the crude product in dry DMF (20 ml) at  $0^\circ\text{C}$  and the mixture was stirred

for 1 h at room temperature. The reaction mixture was diluted with EtOAc (200 ml) and washed with a 10% aqueous sodium thiosulfate solution ( $2 \times 150$  ml). The organic layer was dried over  $\text{MgSO}_4$  and concentrated under reduced pressure. The crude product was purified by flash column chromatography (0.5% MeOH in  $\text{CH}_2\text{Cl}_2$ ) to give diethyl 2-(2,2'-bipyridin-5-ylmethyl)-2-acetamidomalonate (2.5 g, 65%) as a white solid.  $^1\text{H-NMR}$  (500 MHz,  $\text{CDCl}_3$ ):  $\delta$  1.38 (m, 6H), 2.15 (s, 3H), 3.81 (s, 2H), 4.35 (m, 4H), 6.68 (s, 1H), 7.36 (dd, 1H), 7.55 (dd, 1H), 7.87 (m, 1H), 8.36 (d, 1H), 8.41 (d, 1H), 8.42 (d, 1H), 8.74 (dd, 1H).

**Bipyridyl-Alanine: 3-(2,2'-Bipyridin-5-yl)-2-Aminopropanoic Acid.** Diethyl 2-(2,2'-bipyridin-5-ylmethyl)-2-acetamidomalonate (2.5 g, 6.5 mmol) in 12 M HCl was heated to reflux for 6 h. The reaction mixture was concentrated under reduced pressure to give the product (2.3 g, 99%) as a white solid in HCl salt form.  $^1\text{H-NMR}$  (500 MHz,  $\text{CDCl}_3$ ):  $\delta$  3.59 (m, 2H), 4.58 (t, 1H), 8.11 (m, 1H), 8.40 (dd, 1H), 8.67 (d, 1H), 8.70 (m, 1H), 8.83 (d, 1H), 8.99 (dd, 1H). LC-MS (ESI) for calculated  $\text{C}_{13}\text{H}_{13}\text{N}_3\text{O}_2$  ( $M + 1$ ) 243.1, observed 243.1.

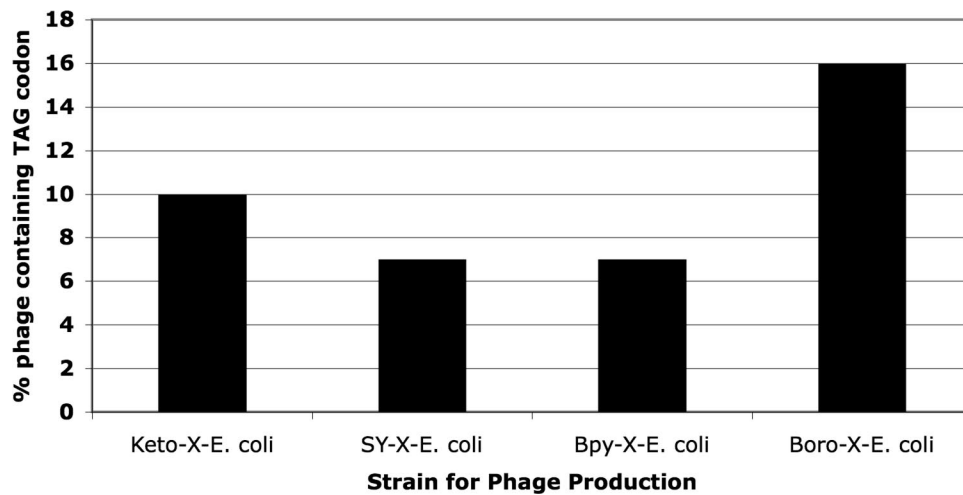

**Fig. S1.** Percent-phage clones containing one or more TAG codons after phage expression from the pSEX-GermNNK library in Keto-X-*E. coli*, SY-X-*E. coli*, Bpy-X-*E. coli*, or Boro-X-*E. coli* ( $n = 100$ ). Expected value is 17.3%; deviation represents a bias in favor of sequences containing only the 20 canonical amino acids. Phage were produced under optimized conditions.

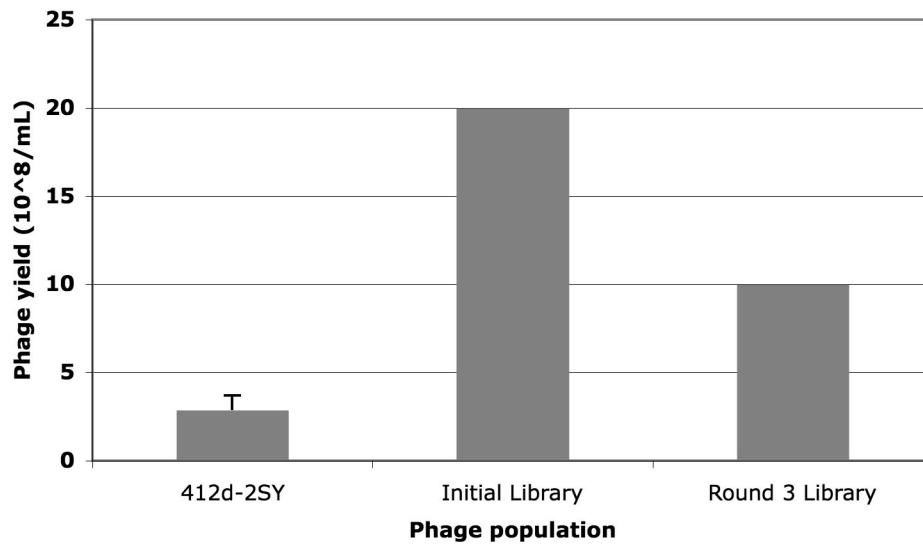

**Fig. S2.** Yield of phage per mL culture of 412d-2SY in comparison with phage yield from initial phage library and library at round three. All phage were produced using SY-X-*E. coli*. For 412d-2SY, titers from three separate phage preparations were averaged and error bar represents plus standard deviation. For 412d-2SY, when sulfotyrosine was omitted from the media, phage yield was  $\approx 1 \times 10^6$  per mL.



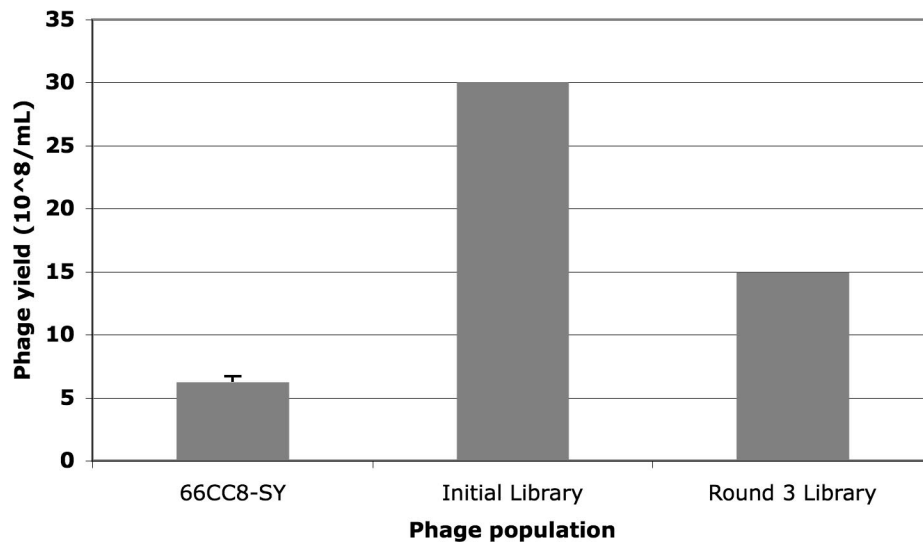

**Fig. S4.** Yield of phage per mL culture of 66CC8-SY in comparison with phage yield from initial phage library and library at round three. All phage were produced in SY-X-*E. coli*. For 66CC8-SY, titers from three separate phage preparations were averaged and error bar represents plus standard deviation. For 66CC8-SY, when unnatural amino acid was omitted from the media, phage yield was  $\approx 5 \times 10^6$ .

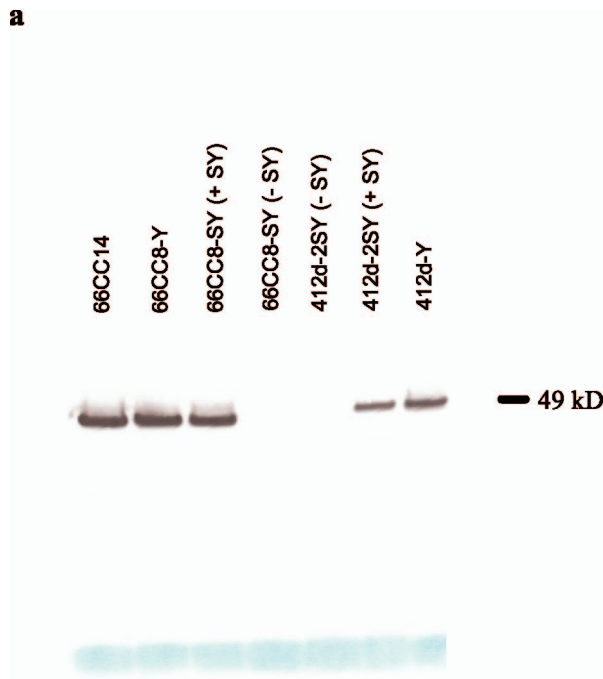

**Fig. S5.** (a) Western blot analysis of protein-G purified Fabs using antihuman kappa light chain HRP antibody developed with metal-enhanced DAB kit (Pierce). Samples were run on a denaturing PAGE gel (Invitrogen NuPAGE 4–12% Bis-Tris). For 66CC8-SY and 412d-SY, lanes corresponding to expression in the absence of sulfotyrosine are also presented to show dependence of sulfated antibody expression on the presence of sulfotyrosine. (b) LCMS (ESI-positive) spectra of Fabs 66CC14, 66CC8-SY, 66CC8-Y, 412d-SY, and 412d-Y. (c) ELISA measuring binding of gp120 by purified Fabs 412d-2SY, 412d-Y, 66CC8-SY, 66CC8, and 66CC14.



**b**

66CC14 ([M+H]<sup>+</sup> calculated: 47698; [M+H]<sup>+</sup> observed: 47697)

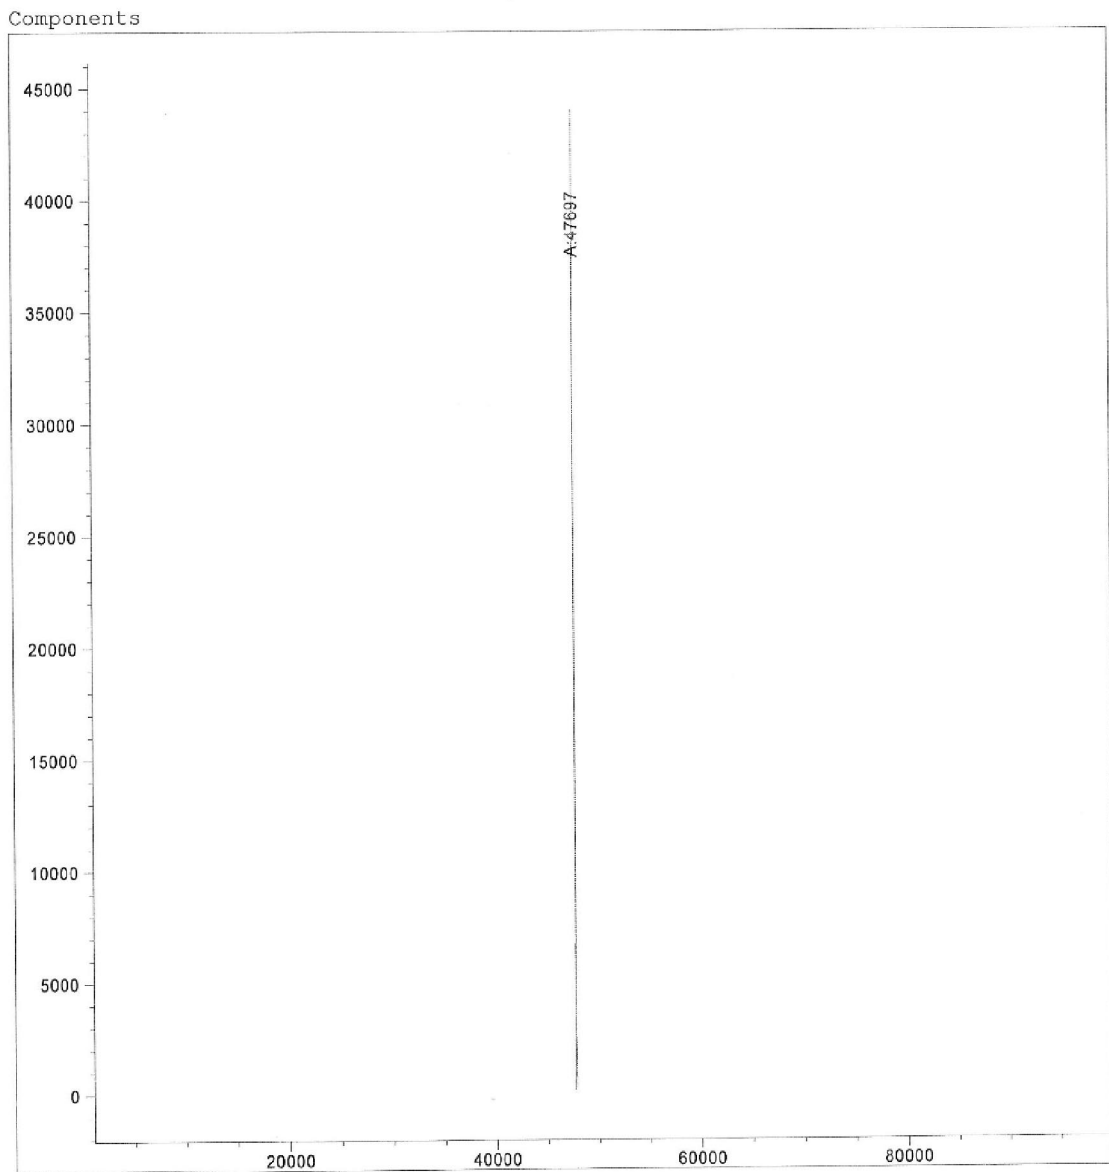

Fig. S5 (continued).

66CC8-SY ([M+H] calculated: 47626; [M+H] observed: 47621)

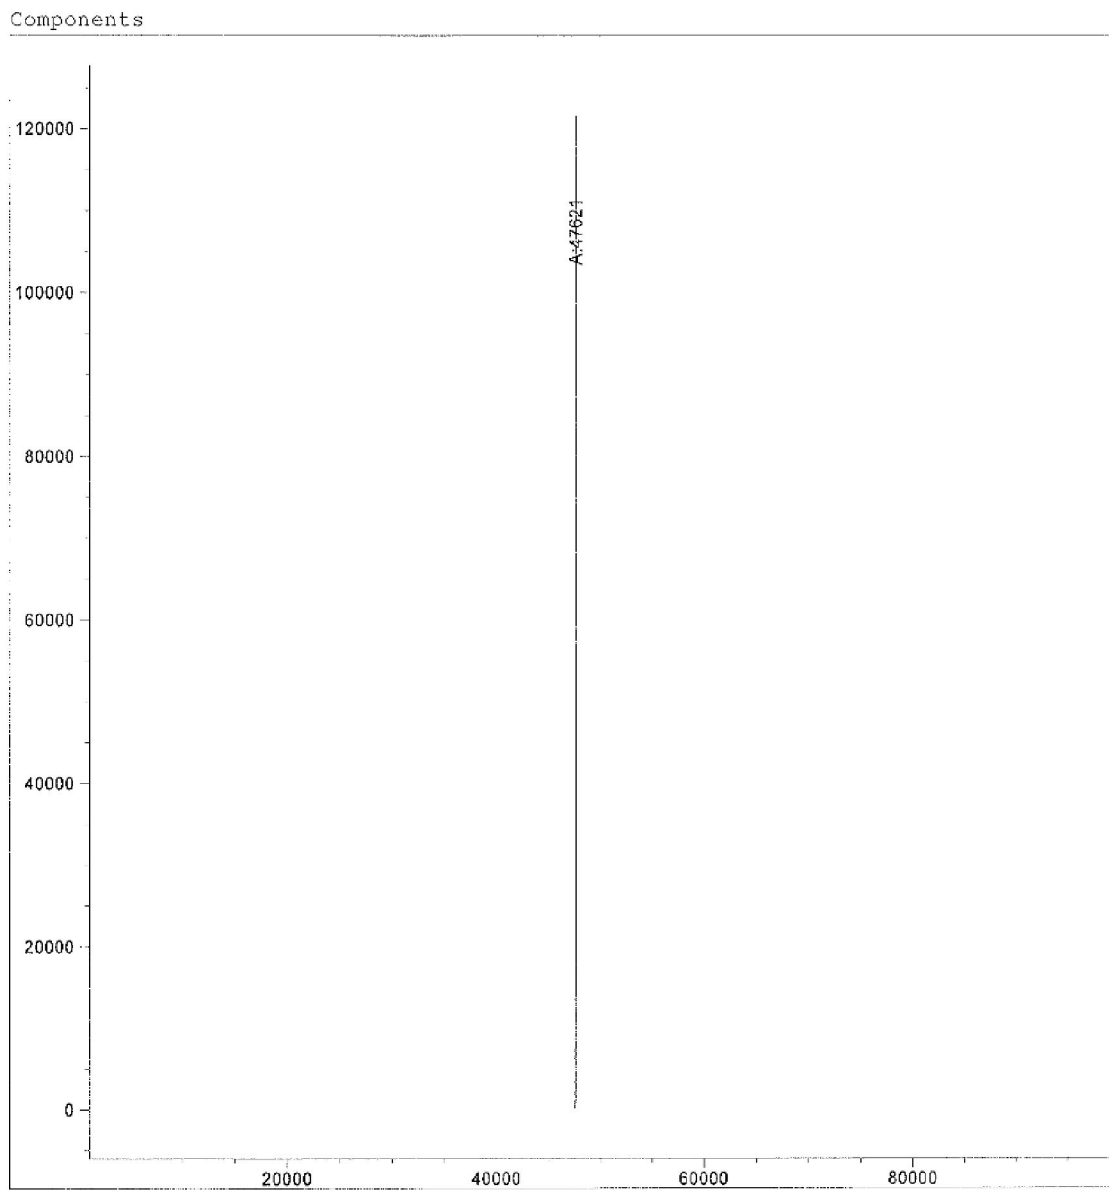

Fig. S5 (continued).

66CC8-Y ([M+H] calculated: 47546; [M+H] observed: 47540)

Components

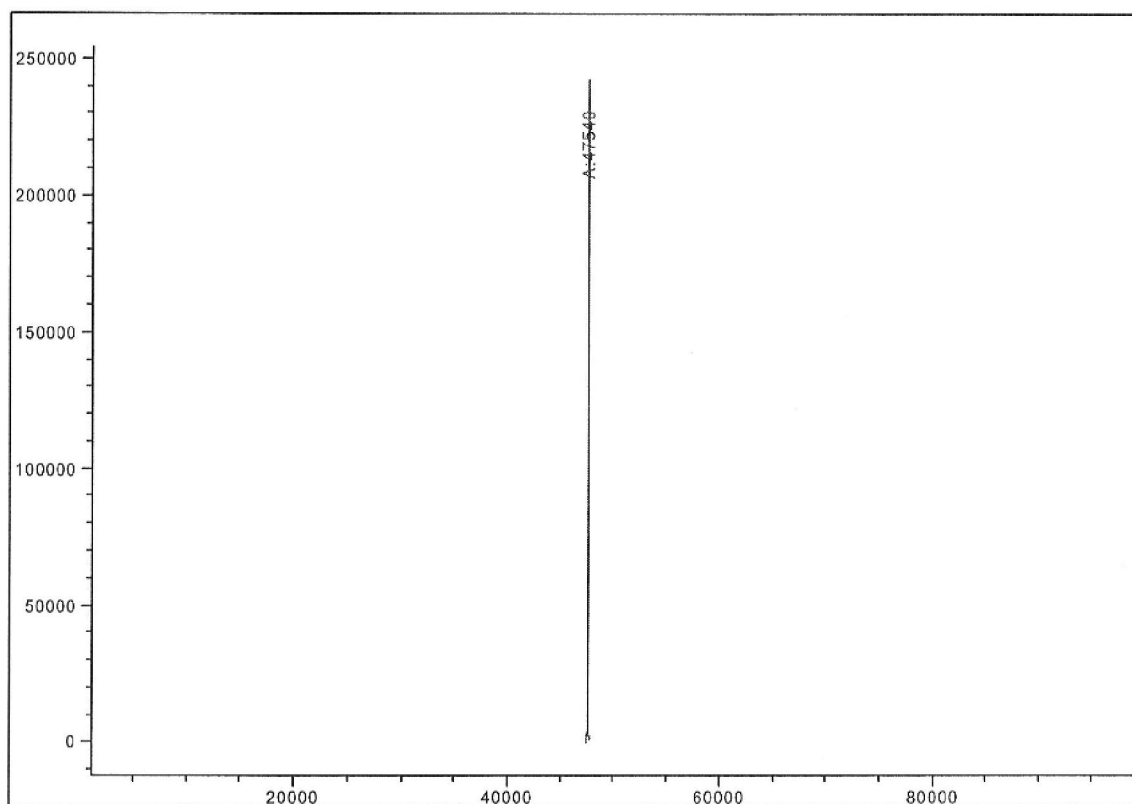

Fig. S5 (continued).

412d-2SY ([M+H] calculated: 48822; [M+H] observed: 48823)

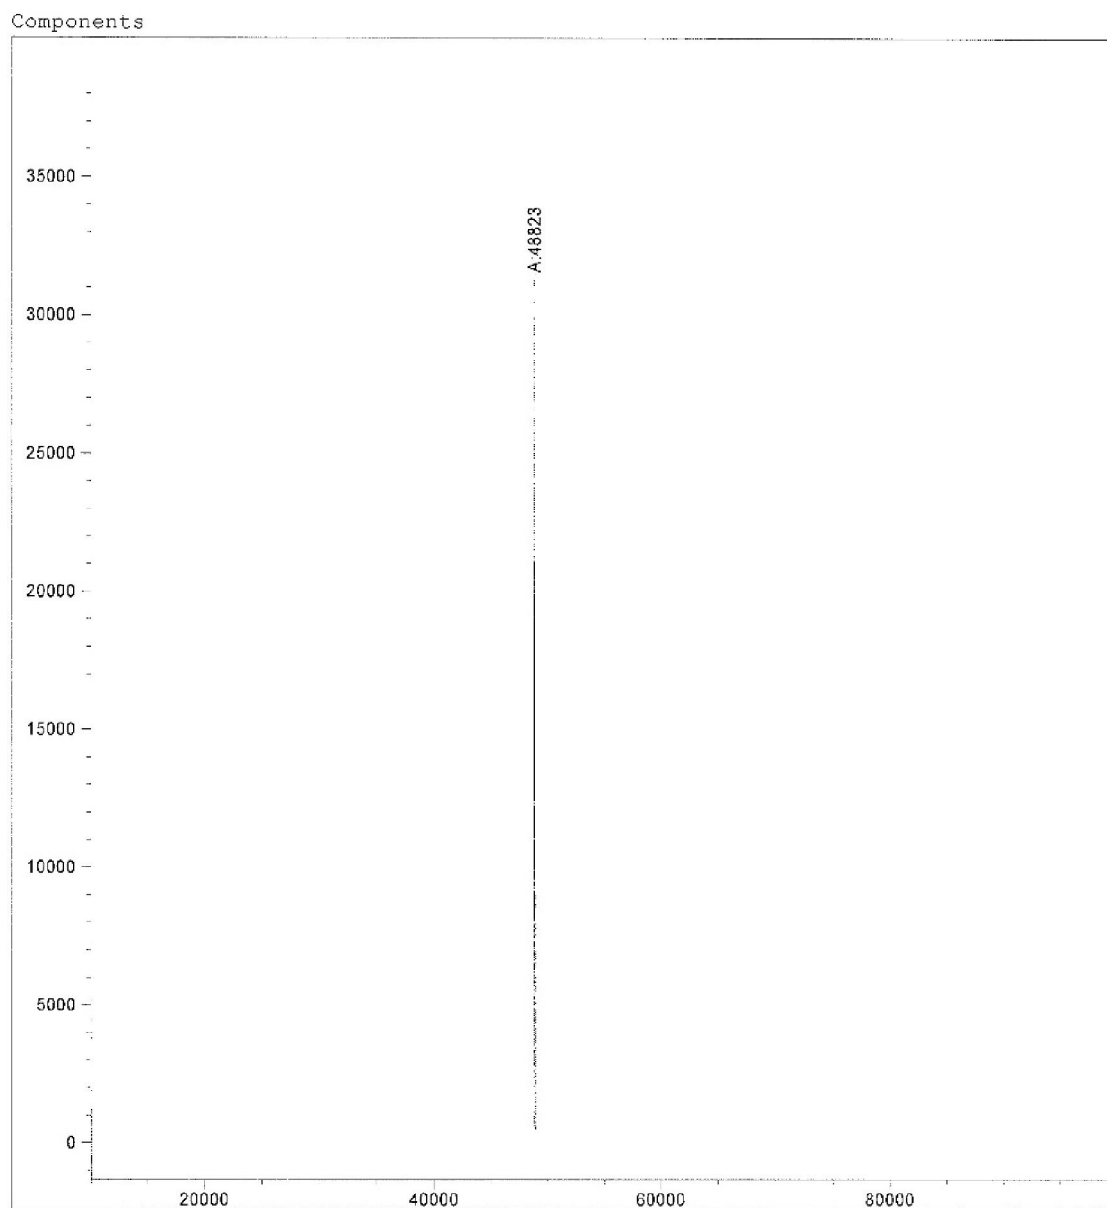

Fig. S5 (continued).

412d-Y ([M+H]<sup>+</sup> calculated: 48662; [M+H]<sup>+</sup> observed: 48665)

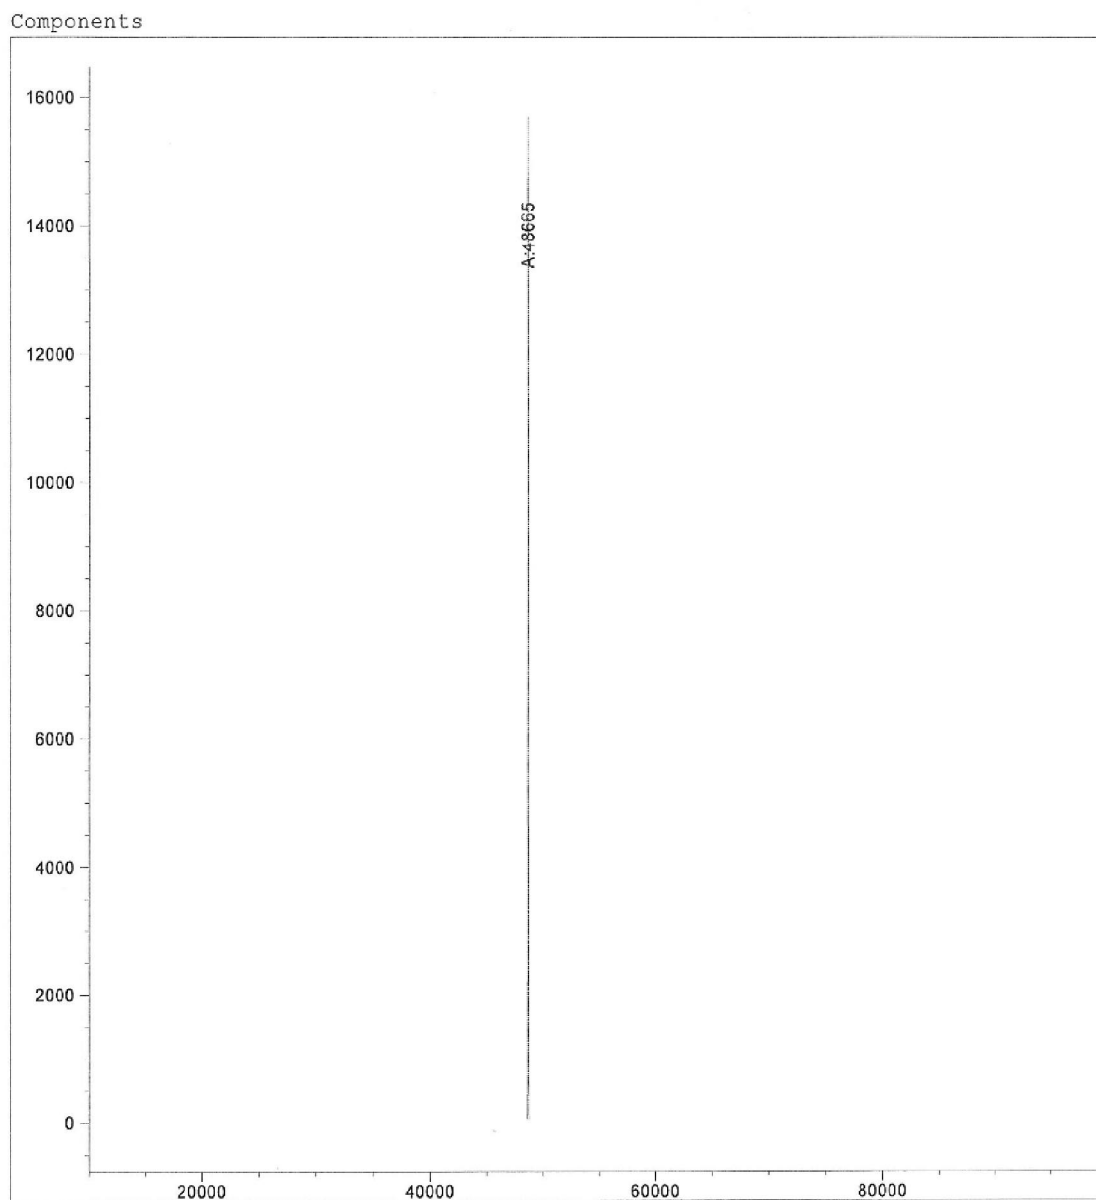

Fig. S5 (continued).

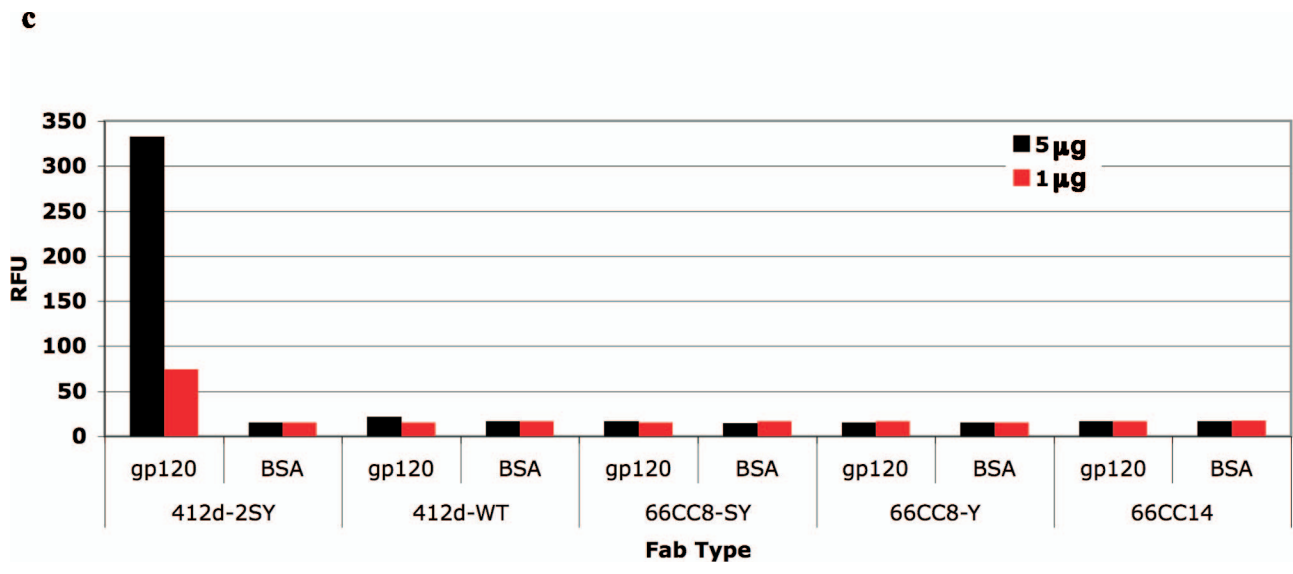

Fig. S5 (continued).



**Table S2. Final optimized conditions and yield bias in favor of phage expressing the test scFv-pIII with a TAT codon in place of the TAG codon (natural phage)**

| Strain                 | Synthetase plasmid backbone | Temperature (degrees °C) | Phage growth time (hr) | Unnatural amino acid concentration (mM) | Bias for natural phage |
|------------------------|-----------------------------|--------------------------|------------------------|-----------------------------------------|------------------------|
| SY-X- <i>E. coli</i>   | pCDF                        | 30                       | 18                     | 15                                      | 3x                     |
| Keto-X- <i>E. coli</i> | pCDF                        | 30                       | 18                     | 8                                       | 2.5x                   |
| Bpy-X- <i>E. coli</i>  | pCDF                        | 30                       | 18                     | 1.5                                     | 2.94x                  |
| Boro-X- <i>E. coli</i> | pCDF                        | 30                       | 18                     | 6                                       | 1.11x                  |



**Table S3. Number of clones containing a TAG codon after phage expression from the pSEX-GermNNK library in Keto-X-*E. coli*, SY-X-*E. coli*, Bpy-X-*E. coli*, or Boro-X-*E. coli* ( $n = 50$  or  $100$ ) and associated  $\chi^2$  values to show that bias on the population level is typified by bias of individual clone**

| Strain                  | # of clones sequenced ( $n$ ) | # containing at least one TAG (measured) | # containing at least one TAG (expected from bias) | Expected standard deviation from binomial distribution* | $\chi^2$ (using binomial distribution standard deviation)** |
|-------------------------|-------------------------------|------------------------------------------|----------------------------------------------------|---------------------------------------------------------|-------------------------------------------------------------|
| SY-X- <i>E. coli</i>    | 100                           | 7                                        | 5.71                                               | 2.32                                                    | 0.62                                                        |
| Keto-X- <i>E. coli</i>  | 100                           | 10                                       | 6.92                                               | 1.79                                                    | 2.94                                                        |
| Bpy-X- <i>E. coli</i>   | 100                           | 7                                        | 5.88                                               | 1.66                                                    | 1.62                                                        |
| Boro-X- <i>E. coli</i>  | 100                           | 16                                       | 15.56                                              | 3.63                                                    | 0.03                                                        |
| Before phage expression | 50                            | 9                                        | 8.65                                               | 2.67                                                    | 0.03                                                        |

Before phage expression entry refers to the clones found in the original library prior to phage production.

\* $[np(1-p)]^{1/2}$  where  $n$  is # of clones sequenced and  $p = (\text{unnatural phage yield}) / (\text{natural phage yield}) \times 0.173$

\*\*Values under 3.84 (corresponding to 5% probability) are accepted as consistent with the expected bias determined on an individual clone



**Table S5. Enrichment for selection of gp120-binders from a 412d library**

| Round | Amount phage loaded | Amount phage eluted | Amount phage in final wash | Loaded/Eluted      |
|-------|---------------------|---------------------|----------------------------|--------------------|
| 1     | $1.23 \times 10^9$  | 4,000               | <40                        | $3.08 \times 10^5$ |
| 2     | $4.5 \times 10^8$   | $1.08 \times 10^4$  | 40                         | $4.17 \times 10^4$ |
| 3     | $6.3 \times 10^6$   | $1.7 \times 10^4$   | 220                        | 370                |
| 4     | $3 \times 10^7$     | 7,600               | ND                         | 3,747              |

**Table S6. Percent phage containing TAG in 412d library selection rounds**

| Round | % phage containing at least one TAG | % phage containing the 412d2TAG doped clone |
|-------|-------------------------------------|---------------------------------------------|
| 1     | 17.5 ( <i>n</i> = 40)               | 2.2 ( <i>n</i> = 45)                        |
| 2     | 14.5 ( <i>n</i> = 55)               | 10.9 ( <i>n</i> = 55)                       |
| 3     | 86 ( <i>n</i> = 50)                 | 74 ( <i>n</i> = 50)                         |
| 4     | 100 ( <i>n</i> = 20)                | 100 ( <i>n</i> = 20)                        |

**Table S7. Enrichment for selection of gp120-binders from a naive germline library**

| Round | Amount phage loaded | Amount phage eluted | Loaded/Eluted      |
|-------|---------------------|---------------------|--------------------|
| 1     | $1.28 \times 10^9$  | $2.0 \times 10^5$   | 6,400              |
| 2     | $2.72 \times 10^8$  | 9,200               | $2.86 \times 10^4$ |
| 3     | $1 \times 10^9$     | $2.4 \times 10^5$   | 4,166              |
| 4     | $2.5 \times 10^7$   | $3.5 \times 10^4$   | 714                |
